# Supplementary material for: Gestational vitamin D deficiency and autism-related traits: the Generation R Study
Source: PubMed Central journal article supplement — Mol Psychiatry. 2016 Nov 29;23(2):240–6. doi: 10.1038/mp.2016.213 (PMC5554617; doi:10.1038/mp.2016.213), 2016-11-29

**Supplementary Figure 1. Flowchart of the study participants**

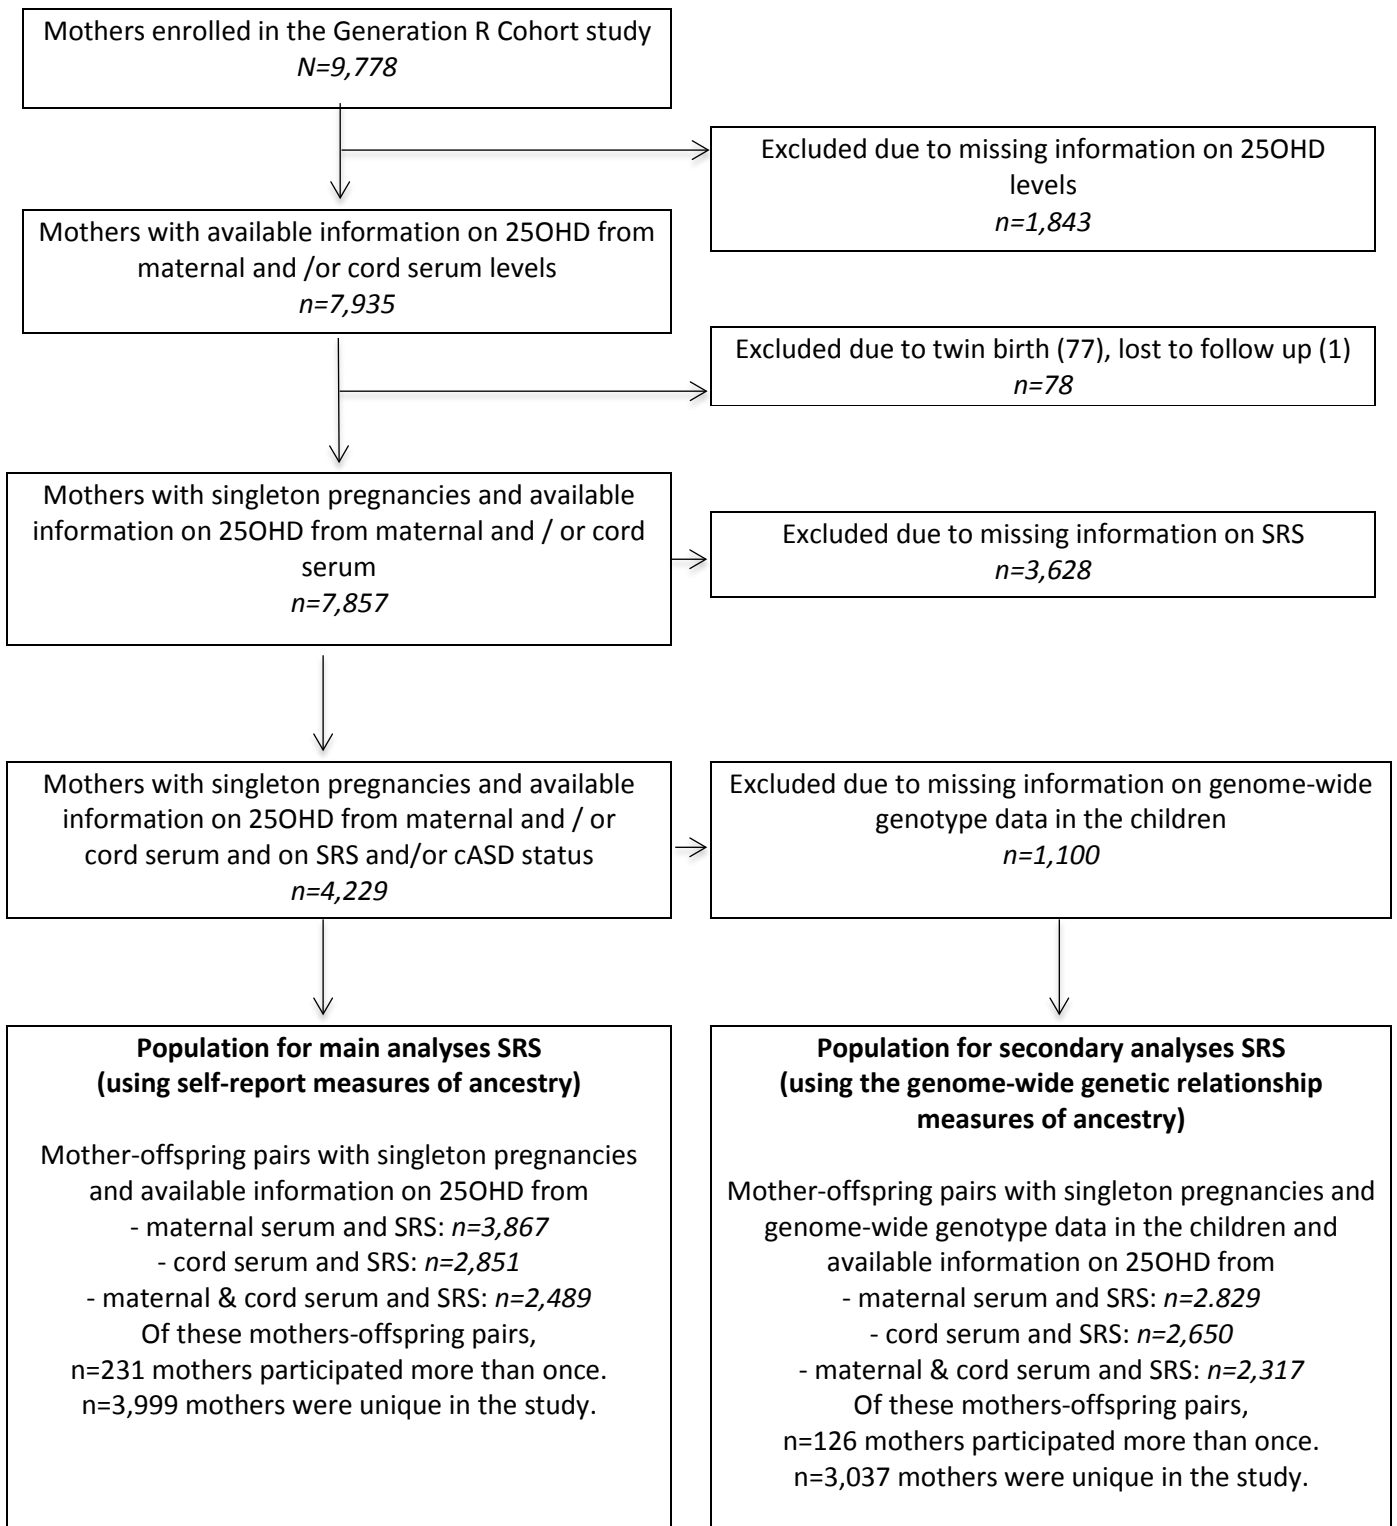

**Supplementary Figure 2a**

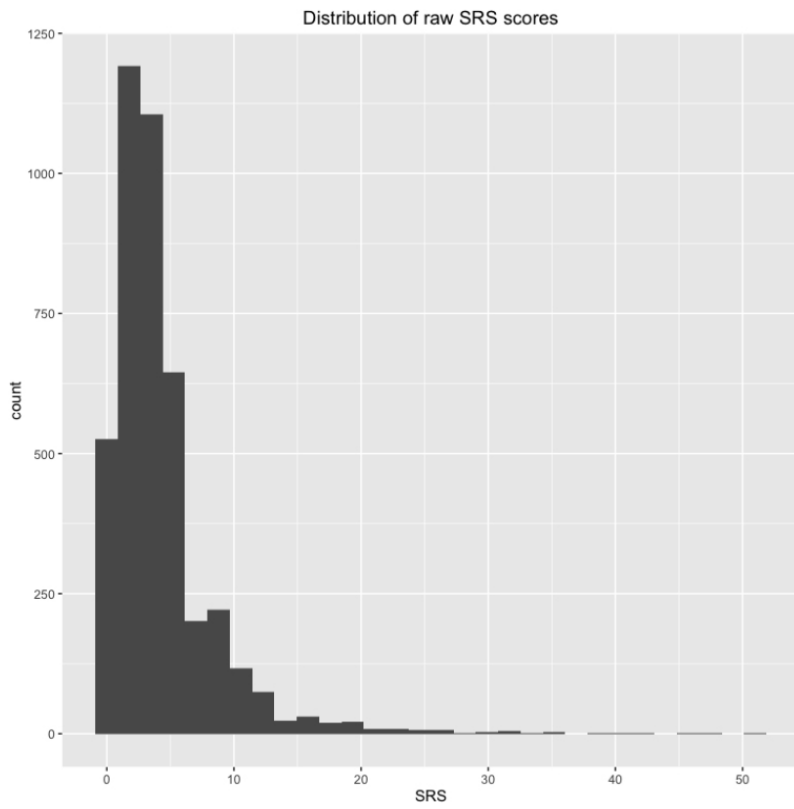

**Supplementary Figure 2b**

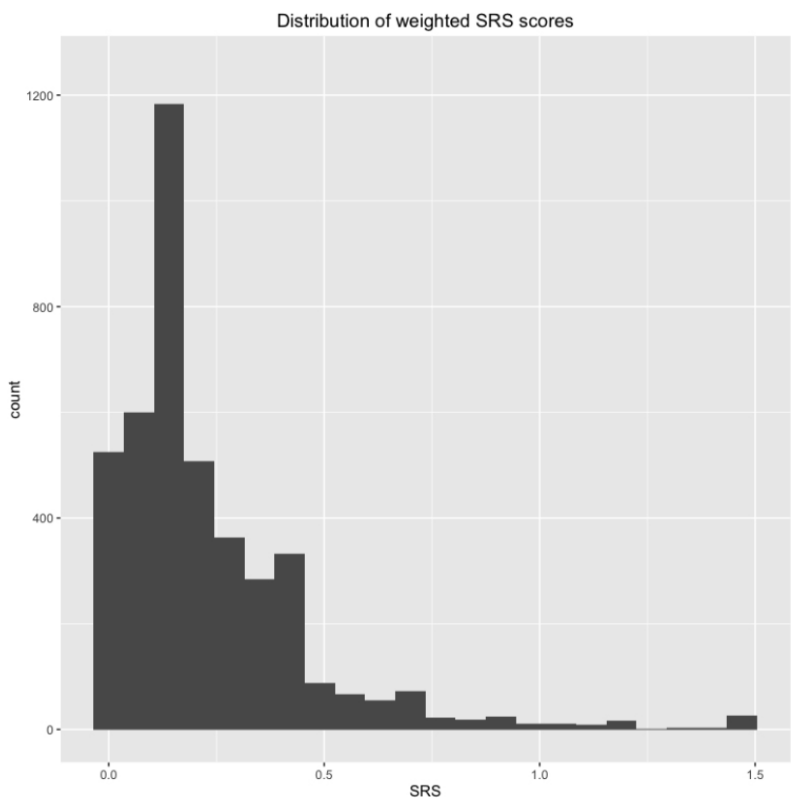

Supplement: NIHMS72590-supplement-Supplementary_figures.pdf [file NIHMS72590-supplement-Supplementary_figures.pdf]
